# Supplementary material for: Mechanisms of amino acid-mediated lifespan extension in Caenorhabditis elegans
Source: PubMed Central journal article supplement (PMC4328591; doi:10.1186/s12863-015-0167-2), 2015-02-03
Supplement: 12863_2015_167_MOESM1_ESM.pdf [file 12863_2015_167_MOESM1_ESM.pdf]

**Table S1.** The effect of amino acid supplementation on *C. elegans* lifespan

| Strain | Concentration | Amino acid    | % of control mean lifespan | <i>n</i> | # of worms | <i>p</i> -value |
|--------|---------------|---------------|----------------------------|----------|------------|-----------------|
| N2     | 1 mM          | alanine       | 108                        | 3        | 264        | 0.015           |
| N2     | 5 mM          |               | 104                        | 3        | 277        | 0.305           |
| N2     | 10 mM         |               | 111                        | 3        | 274        | 0.003           |
| N2     | 1 mM          | arginine      | 108                        | 4        | 428        | 0.007           |
| N2     | 5 mM          |               | 111                        | 4        | 412        | <0.001          |
| N2     | 10 mM         |               | 115                        | 4        | 438        | <0.001          |
| N2     | 1 mM          | asparagine    | 101                        | 3        | 350        | 0.331           |
| N2     | 5 mM          |               | 105                        | 3        | 319        | 0.032           |
| N2     | 10 mM         |               | 75                         | 3        | 297        | <0.001          |
| N2     | 1 mM          | aspartate     | 103                        | 3        | 477        | 0.150           |
| N2     | 5 mM          |               | 100                        | 3        | 495        | 0.052           |
| N2     | 10 mM         |               | 94                         | 3        | 544        | 0.001           |
| N2     | 1 mM          | cysteine      | 109                        | 2        | 200        | 0.029           |
| N2     | 5 mM          |               | 116                        | 2        | 190        | <0.001          |
| N2     | 10 mM         |               | 102                        | 2        | 195        | 0.513           |
| N2     | 1 mM          | glutamate     | 114                        | 2        | 156        | 0.005           |
| N2     | 5 mM          |               | 111                        | 2        | 191        | 0.034           |
| N2     | 10 mM         |               | 92                         | 2        | 172        | 0.005           |
| N2     | 1 mM          | glutamine     | 115                        | 2        | 184        | 0.002           |
| N2     | 5 mM          |               | 116                        | 2        | 196        | 0.002           |
| N2     | 10 mM         |               | 94                         | 2        | 214        | 0.001           |
| N2     | 1 mM          | glycine       | 110                        | 3        | 321        | 0.008           |
| N2     | 5 mM          |               | 103                        | 3        | 298        | 0.538           |
| N2     | 10 mM         |               | 96                         | 3        | 327        | 0.090           |
| N2     | 1 mM          | histidine     | 104                        | 3        | 338        | 0.155           |
| N2     | 5 mM          |               | 109                        | 3        | 269        | <0.001          |
| N2     | 10 mM         |               | 112                        | 3        | 282        | <0.001          |
| N2     | 1 mM          | isoleucine    | 103                        | 3        | 344        | 0.079           |
| N2     | 5 mM          |               | 103                        | 3        | 290        | 0.066           |
| N2     | 10 mM         |               | 103                        | 3        | 360        | 0.033           |
| N2     | 1 mM          | leucine       | 116                        | 2        | 265        | <0.001          |
| N2     | 5 mM          |               | 106                        | 2        | 238        | 0.042           |
| N2     | 10 mM         |               | 107                        | 2        | 240        | 0.032           |
| N2     | 1 mM          | lysine        | 107                        | 4        | 562        | <0.001          |
| N2     | 5 mM          |               | 108                        | 4        | 583        | <0.001          |
| N2     | 10 mM         |               | 106                        | 4        | 547        | <0.001          |
| N2     | 1 mM          | methionine    | 104                        | 2        | 160        | 0.094           |
| N2     | 5 mM          |               | 108                        | 2        | 162        | 0.002           |
| N2     | 10 mM         |               | 114                        | 2        | 148        | <0.001          |
| N2     | 1 mM          | phenylalanine | 97                         | 2        | 167        | 0.491           |
| N2     | 5 mM          |               | 92                         | 2        | 165        | <0.001          |
| N2     | 10 mM         |               | 88                         | 2        | 164        | <0.001          |

|    |       |            |     |   |     |        |
|----|-------|------------|-----|---|-----|--------|
| N2 | 1 mM  | proline    | 117 | 3 | 369 | <0.001 |
| N2 | 5 mM  |            | 119 | 3 | 322 | <0.001 |
| N2 | 10 mM |            | 118 | 3 | 329 | <0.001 |
| N2 | 1 mM  | serine     | 108 | 5 | 495 | <0.001 |
| N2 | 5 mM  |            | 118 | 5 | 501 | <0.001 |
| N2 | 10 mM |            | 122 | 5 | 607 | <0.001 |
| N2 | 1 mM  | threonine  | 100 | 3 | 317 | 0.901  |
| N2 | 5 mM  |            | 103 | 3 | 326 | 0.179  |
| N2 | 10 mM |            | 108 | 3 | 279 | <0.001 |
| N2 | 1 mM  | tryptophan | 114 | 3 | 289 | <0.001 |
| N2 | 5 mM  |            | 106 | 3 | 234 | 0.003  |
| N2 | 10 mM |            | 101 | 3 | 203 | 0.643  |
| N2 | 1 mM  | tyrosine   | 110 | 2 | 198 | <0.001 |
| N2 | 5 mM  |            | 105 | 2 | 186 | 0.001  |
| N2 | 10 mM |            | 102 | 2 | 168 | 0.014  |
| N2 | 1 mM  | valine     | 113 | 3 | 338 | 0.155  |
| N2 | 5 mM  |            | 108 | 3 | 269 | <0.001 |
| N2 | 10 mM |            | 99  | 3 | 282 | <0.001 |
